# Supplementary material for: Novel multifunctional and multitarget homo- (Fe2) and heterobimetallic [(Fe,M) with M = Re or Mn] sulfonyl hydrazones
Source: Royal Society of Chemistry journal article supplement (doi:10.1039/d0dt01756f), 2020-01-01
Supplement: d0dt01756f1.pdf [file d0dt01756f1.pdf]

## **Novel Homo- (Fe<sub>2</sub>) and Heterobimetallic [(Fe,M) with M = Re or Mn] Sulfonfyl Hydrazones.**

Yosselin Huentupil,<sup>a</sup> Patricio Chung,<sup>a</sup> Néstor Novoa,<sup>a</sup> Rodrigo Arancibia,<sup>a,\*</sup> Pascal Roussel,<sup>b</sup> Juan Oyarzo,<sup>c</sup> A. Hugo Klahn,<sup>c</sup> Carlos P. Silva,<sup>d</sup> Carme Calvis,<sup>e</sup> Ramon Messeguer,<sup>e</sup> Ramón Bosque,<sup>f</sup> Concepción López<sup>f,\*</sup>

<sup>a</sup>Laboratorio de Química Inorgánica y Organometálica, Departamento de Química Analítica e Inorgánica, Facultad de Ciencias Químicas, Universidad de Concepción, Edmundo Larenas 129, Casilla 160-c, Concepción, Chile. E-mail: rarancibia@udec.cl

<sup>b</sup> Université Lille Nord de France, Université Lille1, Unité de Catalyse et Chimie du Solide e UMR CNRS 8181, 59650 Villeneuve d'Ascq Cédex, France.

<sup>c</sup> Instituto de Química, Pontificia Universidad Católica de Valparaíso, Casilla 4059, Valparaíso, Chile.

<sup>d</sup> Departamento de Química de los Materiales, Facultad de Química y Biología, Universidad de Santiago de Chile, Casilla 40, Santiago, Chile.

<sup>e</sup> Biomed Division, LEITAT Technological Centre, Parc Científic de Barcelona, Edifici Hèlix, Baldiri i Reixach 13-21, E-08028 Barcelona, Spain.

<sup>f</sup> Departament de Química Inorgànica i Orgànica, Secció de Química Inorgànica, Facultat de Química, Universitat de Barcelona, Martí i Franquès 1-11, E-08028 Barcelona, Spain.

## **Supplementary Materials**

(33 pages)

## CONTENTS

### 1.- Supplementary Figures

**Figure S1.** Schematic view of: **A**) the assembly of a molecule of **3**, sited at  $(x, y, z)$  and another unit at  $(-1+x, y, 1/2-z)$  by cooperative N-H $\cdots$ O intermolecular interactions (blue dotted line) and **B**) simplified view of the CH $\cdots$  $\pi$  short contact between: a) the H13 atom of a molecule at  $(x, y, z)$  and the C<sub>5</sub>H<sub>5</sub> of the vicinal molecule sited at  $(x, -y, 1/2+z)$  (green dotted line) [the distance H13B $\cdots$ centroid of this ring is 2.995 Å]; and b) the hydrogen H8B of a molecule at  $(x, y, z)$  and the C<sub>5</sub>H<sub>5</sub> ring of a close unit located at  $(x, -y, 1/2-z)$  (purple dotted lines) [the separation between the H8B atom and the centroid of this ring is 3.459 Å]. In this figure, the intermolecular N-H $\cdots$ O interactions shown in **A**) appear as a dotted blue line). In both cases the labels of most of the atoms have been omitted for clarity.

**Figure S2.** Simplified view of the assembly of the molecules of **5a** in the crystal through C-H $\cdots$ O interactions involving the hydrogen atoms H12 and H13 of a molecule at  $(x, y, z)$  and oxygen atoms of the sulfonyl unit (O4 and O5, respectively) of a vicinal unit sited at  $(x, -1+y, z)$  (blue dotted line) giving chains. These structural units are connected by the C-H $\cdots$  $\pi$  interactions the H3 atom of a molecule and the C<sub>5</sub>H<sub>5</sub> ring of the ferrocenyl unit belonging to a different chain (purple dotted line) and C-H $\cdots$ O short contacts (red dotted line) involving the oxygen O2 of one of the CO ligands of each cyrhetrenyl unit. Labels of most of the atoms have been omitted for clarity.

**Figure S3.** Schematic view of the connectivity between molecules **A** and **B** present in the crystals of **5b** through intermolecular N-H $\cdots$ O interactions (N2A-H2A  $\cdots$  O5B (in purple) and N2B-H2B  $\cdots$  O5A (in red)). Labels of most of the atoms have been omitted for clarity.

**Figure S4.** <sup>1</sup>H-NMR spectra of a freshly prepared solution of compound [Fe( $\eta^5$ -C<sub>5</sub>H<sub>5</sub>){( $\eta^5$ -C<sub>5</sub>H<sub>4</sub>)-S(O)<sub>2</sub>-NH-NH<sub>2</sub>}] (**2**) in CD<sub>3</sub>CN at 298K.

**Figure S5.** <sup>1</sup>H-NMR spectra of a freshly prepared solution of compound [Fe( $\eta^5$ -C<sub>5</sub>H<sub>5</sub>){[( $\eta^5$ -C<sub>5</sub>H<sub>4</sub>)-S(O)<sub>2</sub>-NH-N=CH-( $\eta^5$ -C<sub>5</sub>H<sub>4</sub>)]Fe( $\eta^5$ -C<sub>5</sub>H<sub>5</sub>)}] (**4**) in CD<sub>3</sub>CN at 298 K.

**Figure S6.** <sup>1</sup>H-NMR spectra of a freshly prepared solution of compound [Fe( $\eta^5$ -C<sub>5</sub>H<sub>5</sub>){[( $\eta^5$ -C<sub>5</sub>H<sub>4</sub>)-S(O)<sub>2</sub>-NH-N=CH-( $\eta^5$ -C<sub>5</sub>H<sub>4</sub>)]Re(CO)<sub>3</sub>}] (**5a**) in CD<sub>3</sub>CN at 298 K.

**Figure S7.** <sup>1</sup>H-NMR spectra of a freshly prepared solution of compound [Fe( $\eta^5$ -C<sub>5</sub>H<sub>5</sub>){[( $\eta^5$ -C<sub>5</sub>H<sub>4</sub>)-S(O)<sub>2</sub>-NH-N=CH-( $\eta^5$ -C<sub>5</sub>H<sub>4</sub>)]Mn(CO)<sub>3</sub>}] (**5b**) in CD<sub>3</sub>CN at 298 K.

**Figure S8.** <sup>1</sup>H-NMR spectra of a freshly prepared solution of compound [Fe( $\eta^5$ -C<sub>5</sub>H<sub>5</sub>){[( $\eta^5$ -C<sub>5</sub>H<sub>4</sub>)-S(O)<sub>2</sub>-NH-N=CH-( $\eta^5$ -C<sub>5</sub>H<sub>4</sub>)]Fe( $\eta^5$ -C<sub>5</sub>H<sub>5</sub>)}] (**4**) in DMSO-d<sub>6</sub> and after different periods of storage (*t*) at 298 K.

**Figure S9.** <sup>1</sup>H-NMR spectra of a freshly prepared solution of compound [Fe( $\eta^5$ -C<sub>5</sub>H<sub>5</sub>){[( $\eta^5$ -C<sub>5</sub>H<sub>4</sub>)-S(O)<sub>2</sub>-NH-N=CH-( $\eta^5$ -C<sub>5</sub>H<sub>4</sub>)]Re(CO)<sub>3</sub>}] (**5a**) in DMSO-d<sub>6</sub> and after different periods of storage at 298 K.

**Figure S10.** <sup>1</sup>H-NMR spectra of a freshly prepared solution of compound [Fe( $\eta^5$ -C<sub>5</sub>H<sub>5</sub>){[( $\eta^5$ -C<sub>5</sub>H<sub>4</sub>)-S(O)<sub>2</sub>-NH-N=CH-( $\eta^5$ -C<sub>5</sub>H<sub>4</sub>)]Mn(CO)<sub>3</sub>}] (**5b**) in DMSO-d<sub>6</sub> and after different periods of storage (*t*) at 298 K.

**Figure S11.**  $^1\text{H-NMR}$  spectrum of a solution of compound  $[\text{Fe}(\eta^5\text{-C}_5\text{H}_5)\{[(\eta^5\text{-C}_5\text{H}_4)\text{-S(O)}_2\text{-NH-N=CH-(}\eta^5\text{-C}_5\text{H}_4)]\text{Fe}(\eta^5\text{-C}_5\text{H}_5)\}]$  (**4**) in a mixture  $\text{DMSO-d}_6\text{:D}_2\text{O}$  (1:1) at 298 K.

**Figure S12.** Partial views of the  $^1\text{H-NMR}$  spectrum of a solution of compound  $[\text{Fe}(\eta^5\text{-C}_5\text{H}_5)\{[(\eta^5\text{-C}_5\text{H}_4)\text{-S(O)}_2\text{-NH-N=CH-(}\eta^5\text{-C}_5\text{H}_4)]\text{Re(CO)}_3\}]$  (**5a**) in a mixture  $\text{DMSO-d}_6\text{:D}_2\text{O}$  (1:1) at 298 K.

**Figure S13.** Partial views of the  $^1\text{H-NMR}$  spectra of a freshly prepared solution of compound  $[\text{Fe}(\eta^5\text{-C}_5\text{H}_5)\{[(\eta^5\text{-C}_5\text{H}_4)\text{-S(O)}_2\text{-NH-N=CH-(}\eta^5\text{-C}_5\text{H}_4)]\text{Mn(CO)}_3\}]$  (**5b**) in a mixture  $\text{DMSO-d}_6\text{:D}_2\text{O}$  (1:1) and after different periods of storage ( $t$ ) at 298 K.

**Figure S14.** The cyclic voltammograms for compound **4**, at scan rates of 50, 100, 250  $\text{mV s}^{-1}$ .

**Figure S15.** The cyclic voltammograms for compound **5a**, at scan rates of 50, 100, 250  $\text{mV s}^{-1}$ .

**Figure S16.** The cyclic voltammograms for compound **5b**, at scan rates of 50, 100, 250  $\text{mV s}^{-1}$ .

**Figure S17.** BJ Inhibition of cell growth proliferation in the normal and non-tumoral BJ cell line after 72 h of exposure to compounds **2**, **4**, **5a**, **5b** and cisplatin.

## 2.- Supplementary Tables

**Table S1.** Crystal data and details of the refinement of the crystal structures of compounds:  $[\text{Fe}(\eta^5\text{-C}_5\text{H}_5)\{[(\eta^5\text{-C}_5\text{H}_4)\text{-SO}_2\text{-NH-N=CMe}_2\}]$  (**3**) and  $[\text{Fe}(\eta^5\text{-C}_5\text{H}_5)\{[(\eta^5\text{-C}_5\text{H}_4)\text{-S(O)}_2\text{-NH-N=CH-(}\eta^5\text{-C}_5\text{H}_4)]\text{M(CO)}_3\}]$  with  $\text{M} = \text{Re}$  (**5a**) or  $\text{Mn}$  (**5b**).

**Table S2.** Final atomic coordinates for the optimized geometry of compound  $[\text{Fe}(\eta^5\text{-C}_5\text{H}_5)\{[(\eta^5\text{-C}_5\text{H}_4)\text{-S(O)}_2\text{-NH-NH}_2\}]$  (**2**)

**Table S3.** Final atomic coordinates for the optimized geometry of compound  $[\text{Fe}(\eta^5\text{-C}_5\text{H}_5)\{[(\eta^5\text{-C}_5\text{H}_4)\text{-S(O)}_2\text{-NH-N=CMe}_2\}]$  (**3**).

**Table S4.** Final atomic coordinates for the optimized geometry of compound  $[\text{Fe}(\eta^5\text{-C}_5\text{H}_5)\{[(\eta^5\text{-C}_5\text{H}_4)\text{-S(O)}_2\text{-NH-N=CH-(}\eta^5\text{-C}_5\text{H}_4)]\text{Fe}(\eta^5\text{-C}_5\text{H}_5)\}]$  (**4**).

**Table S5.** Final atomic coordinates for the optimized geometry of compound  $[\text{Fe}(\eta^5\text{-C}_5\text{H}_5)\{[(\eta^5\text{-C}_5\text{H}_4)\text{-S(O)}_2\text{-NH-N=CH-(}\eta^5\text{-C}_5\text{H}_4)]\text{Re(CO)}_3\}]$  (**5a**).

**Table S6.** Final atomic coordinates for the optimized geometry of compound  $[\text{Fe}(\eta^5\text{-C}_5\text{H}_5)\{[(\eta^5\text{-C}_5\text{H}_4)\text{-S(O)}_2\text{-NH-N=CH-(}\eta^5\text{-C}_5\text{H}_4)]\text{Mn(CO)}_3\}]$  (**5b**).

**Table S7.** Summary of experimental ultraviolet data [position of the bands (wavelengths  $\lambda_i$  (in nm)) and logarithms of the molar extinction coefficients, ( $\log \epsilon_i$ , in parenthesis)] and computational studies [Monoelectronic transitions with greater contributions ( $\geq 15\%$ ) to the absorption bands detected in the UV-vis spectra of compounds **2-4**, **5a** and **5b**, calculated position of the bands  $\lambda_i$  (calc) in nm and oscillator strengths ( $f$ )].

## 1.- Supplementary Figures

**Figure S1.** Schematic view of: **A)** the assembly of a molecule of **3**, sited at  $(x, y, z)$  and another unit at  $(-1+x, y, 1/2-z)$  by cooperative N-H $\cdots$ O intermolecular interactions (blue dotted line) and **B)** simplified view of the CH $\cdots$  $\pi$  short contact between: a) the H13 atom of a molecule at  $(x, y, z)$  and the C<sub>5</sub>H<sub>5</sub> of the vicinal molecule sited at  $(x, -y, 1/2+z)$  (green dotted line) [the distance H13B $\cdots$ centroid of this ring is 2.995 Å]; and b) the hydrogen H8B of a molecule at  $(x, y, z)$  and the C<sub>5</sub>H<sub>5</sub> ring of a close unit located at  $(x, -y, 1/2-z)$  (purple dotted lines) [the separation between the H8B atom and the centroid of this ring is 3.459 Å]. In this figure, the intermolecular N-H $\cdots$ O interactions shown in **A)** appear as a dotted blue line). In both cases the labels of most of the atoms have been omitted for clarity.

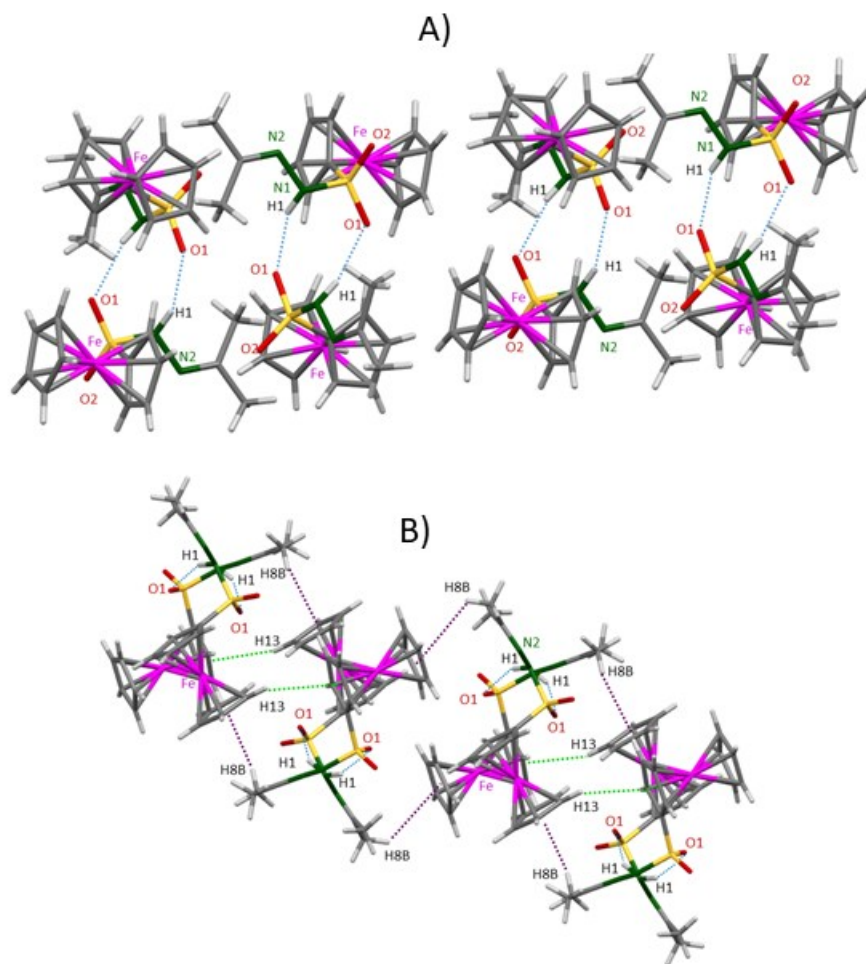

**Figure S2.** Simplified view of the assembly of the molecules of **5a** in the crystal through C-H...O interactions involving the hydrogen atoms H12 and H13 of a molecule at  $(x, y, z)$  and oxygen atoms of the sulfonyl unit (O4 and O5, respectively) of a vicinal unit sited at  $(x, -1+y, z)$  (blue dotted line) giving chains. These structural units are connected by the C-H... $\pi$  interactions the H3 atom of a molecule and the C<sub>5</sub>H<sub>5</sub> ring of the ferrocenyl unit belonging to a different chain (purple dotted line) and C-H...O short contacts (red dotted line) involving the oxygen O2 of one of the CO ligands of each cyrhetrenyl unit. Labels of most of the atoms have been omitted for clarity.

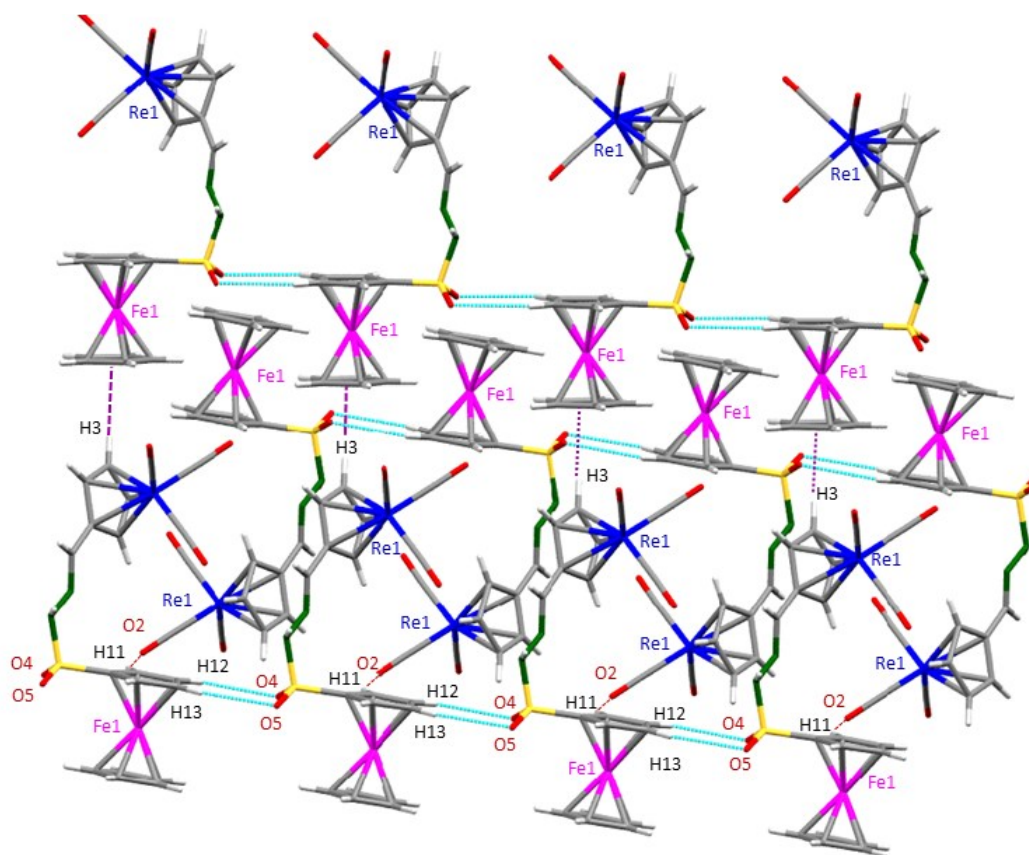

**Figure S3.** Schematic view of the connectivity between molecules **A** and **B** present in the crystals of **5b** through intermolecular N-H...O interactions (N2A-H2A ...O5B (in purple) and N2B-H2B...O5A (in red)). Labels of most of the atoms have been omitted for clarity.

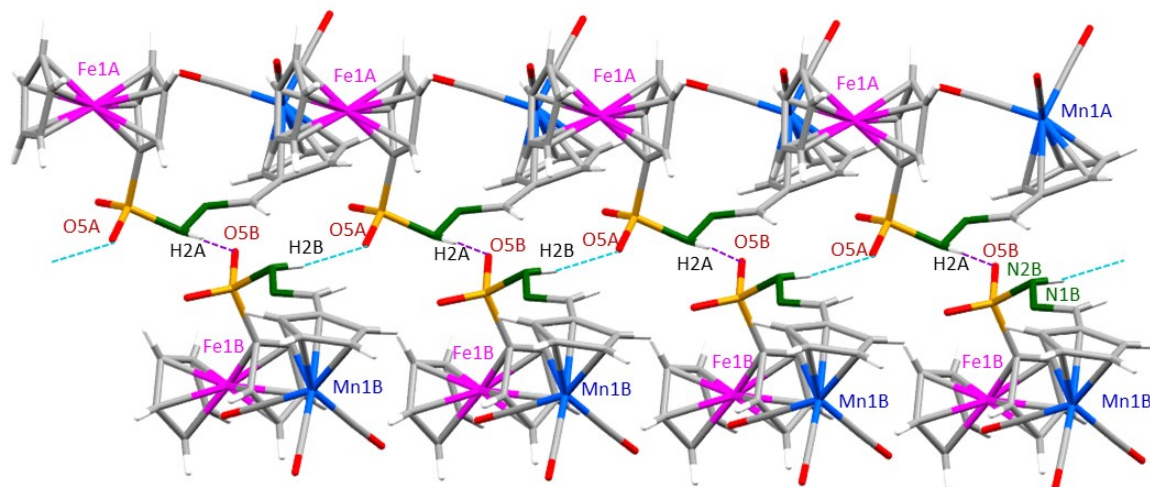

**Figure S4.**  $^1\text{H-NMR}$  spectra of a freshly prepared solution of compound  $[\text{Fe}(\eta^5\text{-C}_5\text{H}_5)\{\eta^5\text{-C}_5\text{H}_4\text{-S}(\text{O})_2\text{-NH-NH}_2\}]$  (**2**) in  $\text{CD}_3\text{CN}$  at 298K.

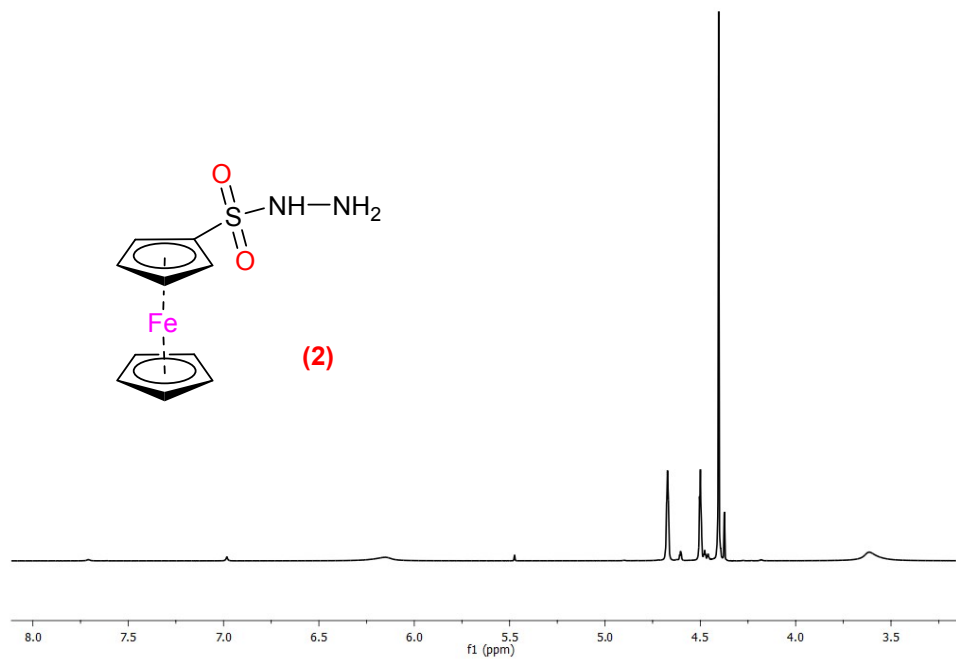

**Figure S5.**  $^1\text{H-NMR}$  spectra of a freshly prepared solution of compound  $[\text{Fe}(\eta^5\text{-C}_5\text{H}_5)\{[(\eta^5\text{-C}_5\text{H}_4)\text{-S(O)}_2\text{-NH-N=CH-(}\eta^5\text{-C}_5\text{H}_4)]\text{Fe}(\eta^5\text{-C}_5\text{H}_5)\}]$  (**4**) in  $\text{CD}_3\text{CN}$  at 298 K.

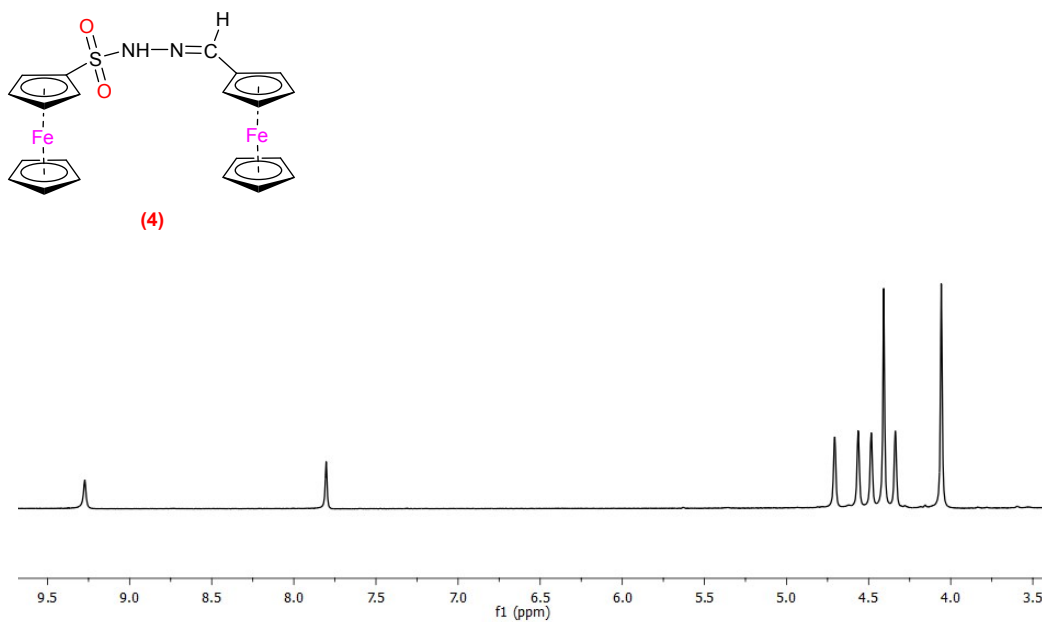



**Figure S6.**  $^1\text{H-NMR}$  spectra of a freshly prepared solution of compound  $[\text{Fe}(\eta^5\text{-C}_5\text{H}_5)\{[(\eta^5\text{-C}_5\text{H}_4)\text{-S(O)}_2\text{-NH-N=CH-(}\eta^5\text{-C}_5\text{H}_4)]\text{Re(CO)}_3\}]$  (**5a**) in  $\text{CD}_3\text{CN}$  at 298 K.

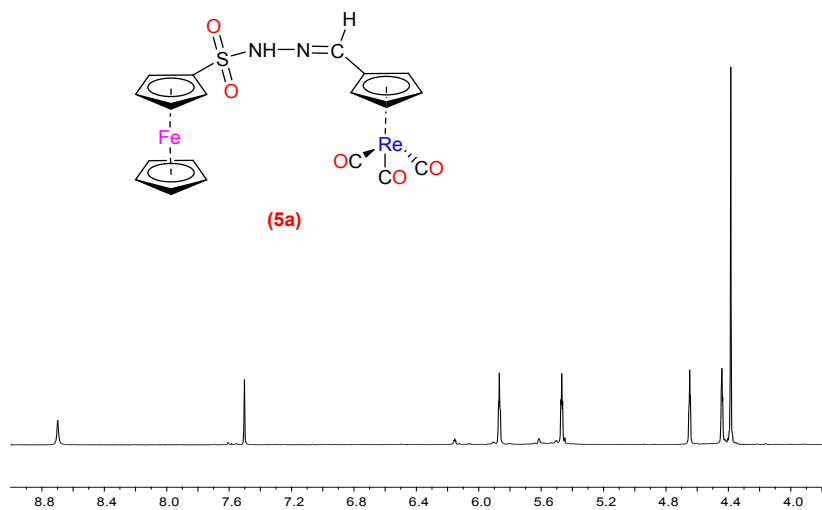

**Figure S7.**  $^1\text{H-NMR}$  spectra of a freshly prepared solution of compound  $[\text{Fe}(\eta^5\text{-C}_5\text{H}_5)\{[(\eta^5\text{-C}_5\text{H}_4)\text{-S(O)}_2\text{-NH-N=CH-(}\eta^5\text{-C}_5\text{H}_4)]\text{Mn(CO)}_3\}]$  (**5b**) in  $\text{CD}_3\text{CN}$  at 298 K.

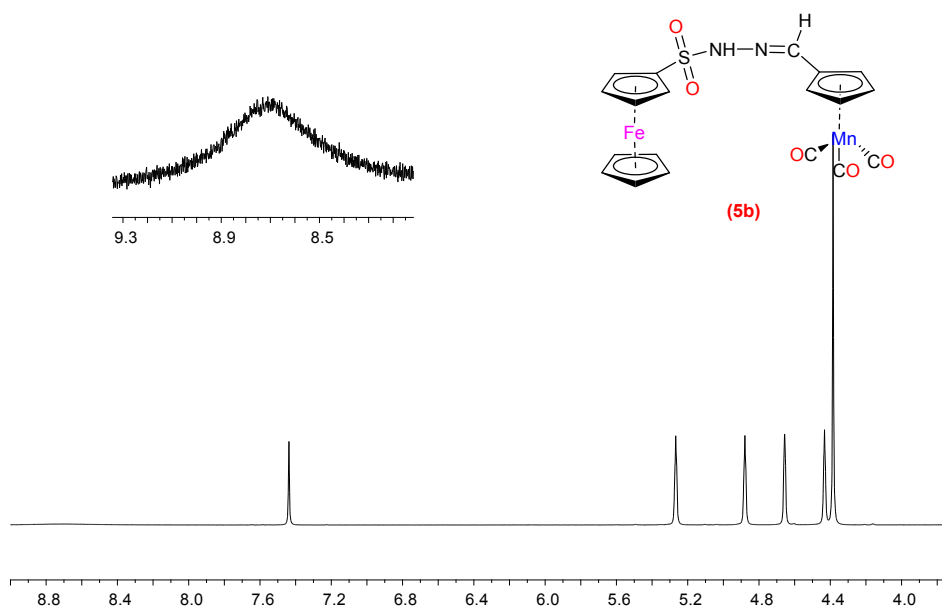

**Figure S8.**  $^1\text{H-NMR}$  spectra of a freshly prepared solution of compound  $[\text{Fe}(\eta^5\text{-C}_5\text{H}_5)\{[(\eta^5\text{-C}_5\text{H}_4)\text{-S}(\text{O})_2\text{-NH-N}=\text{CH}-(\eta^5\text{-C}_5\text{H}_4)]\text{Fe}(\eta^5\text{-C}_5\text{H}_5)\}]$  (**4**) in  $\text{DMSO-d}_6$  and after different periods of storage ( $t$ ) at 298 K.

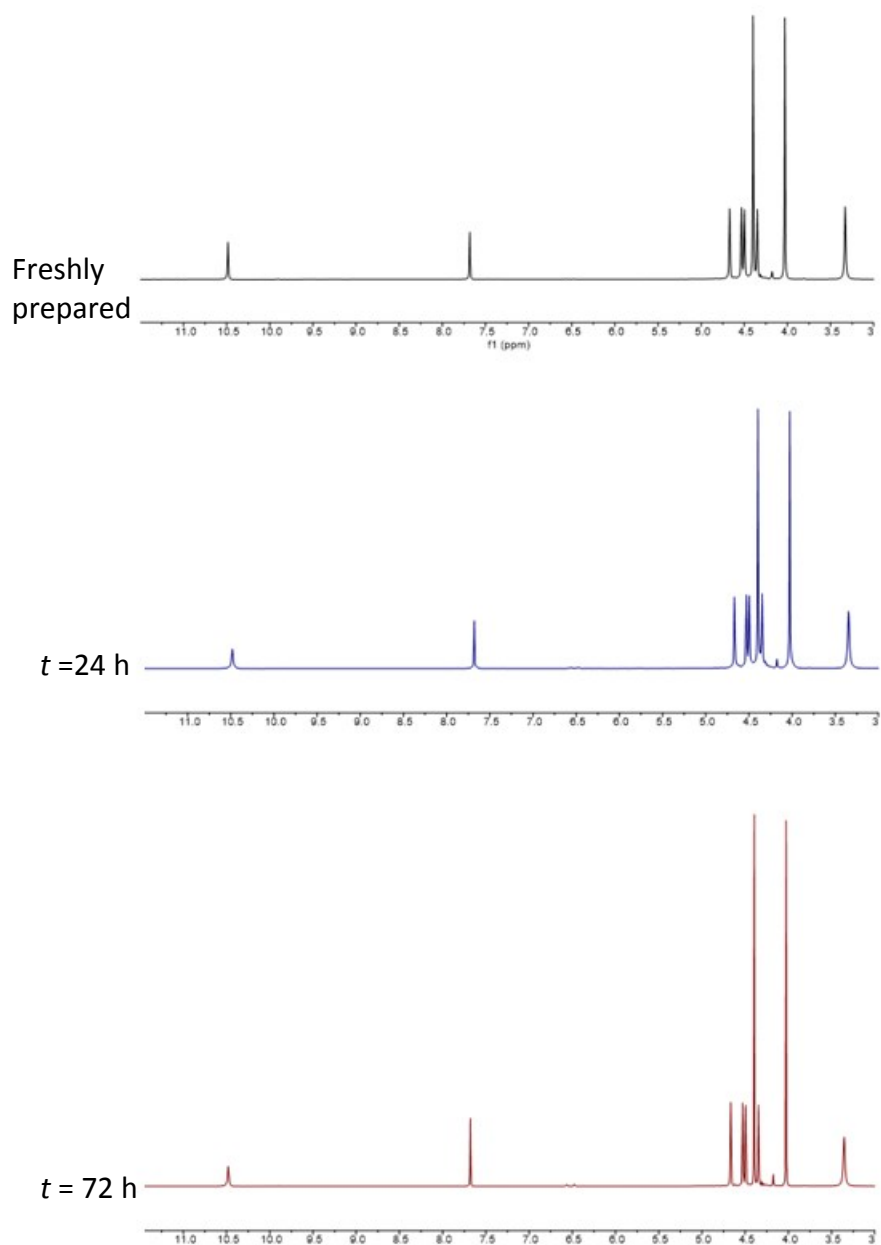

**Figure S9.**  $^1\text{H-NMR}$  spectra of a freshly prepared solution of compound  $[\text{Fe}(\eta^5\text{-C}_5\text{H}_5)\{[(\eta^5\text{-C}_5\text{H}_4)\text{-S}(\text{O})_2\text{-NH-N=CH-(}\eta^5\text{-C}_5\text{H}_4)]\text{Re}(\text{CO})_3\}]$  (**5a**) in  $\text{DMSO-d}_6$  and after different periods of storage at 298 K.

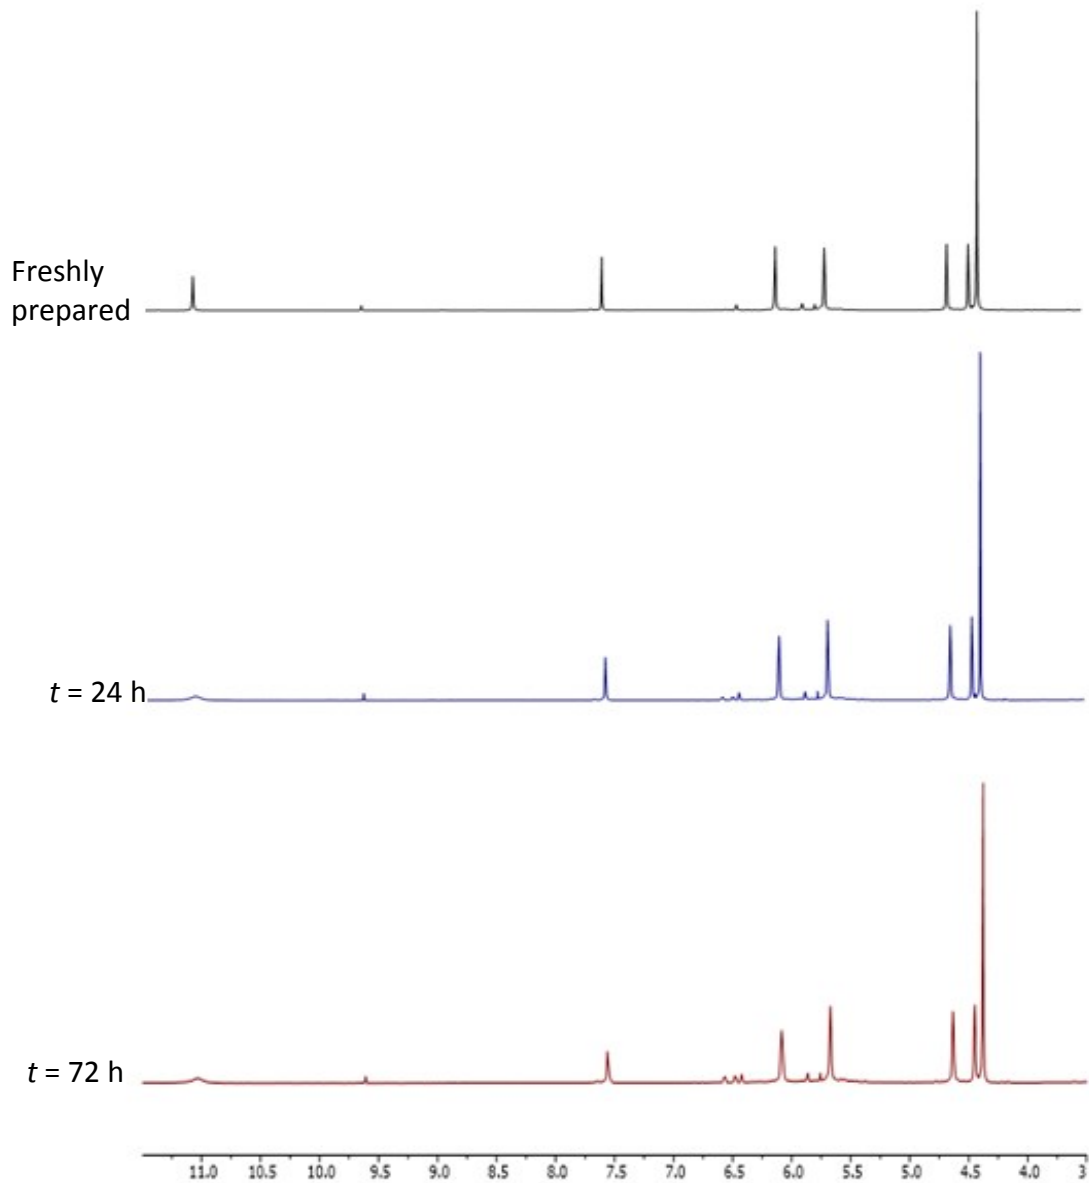

**Figure S10.**  $^1\text{H-NMR}$  spectra of a freshly prepared solution of compound  $[\text{Fe}(\eta^5\text{-C}_5\text{H}_5)\{[(\eta^5\text{-C}_5\text{H}_4)\text{-S}(\text{O})_2\text{-NH-N}=\text{CH}-(\eta^5\text{-C}_5\text{H}_4)]\text{Mn}(\text{CO})_3\}]$  (**5b**) in  $\text{DMSO-d}_6$  and after different periods of storage ( $t$ ) at 298 K.

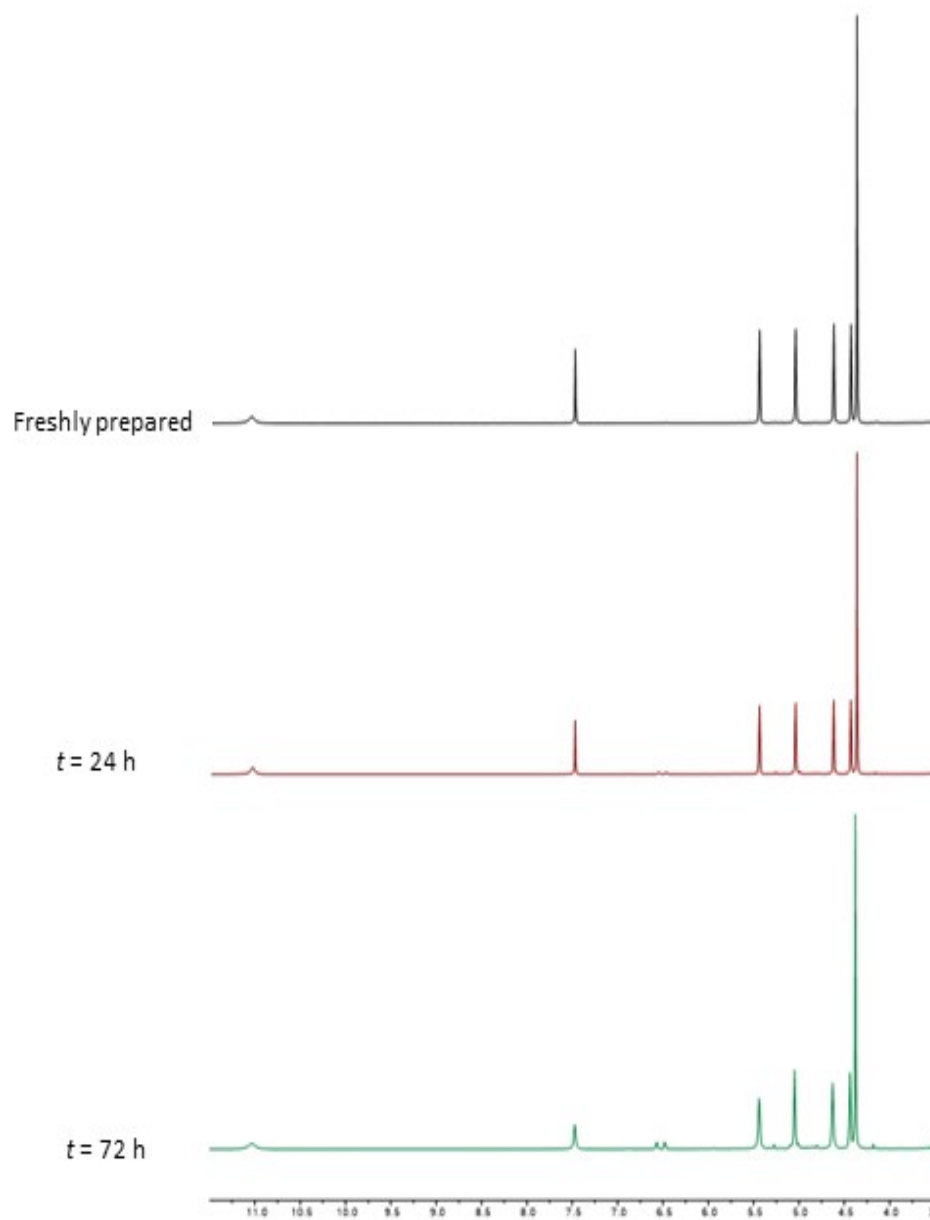

**Figure S11.**  $^1\text{H-NMR}$  spectra of a solution of compound  $[\text{Fe}(\eta^5\text{-C}_5\text{H}_5)\{[(\eta^5\text{-C}_5\text{H}_4)\text{-S(O)}_2\text{-NH-N=CH-}(\eta^5\text{-C}_5\text{H}_4)]\text{Fe}(\eta^5\text{-C}_5\text{H}_5)\}]$  (**4**) in a mixture  $\text{DMSO-d}_6\text{:D}_2\text{O}$  (1:1) at 298 K.

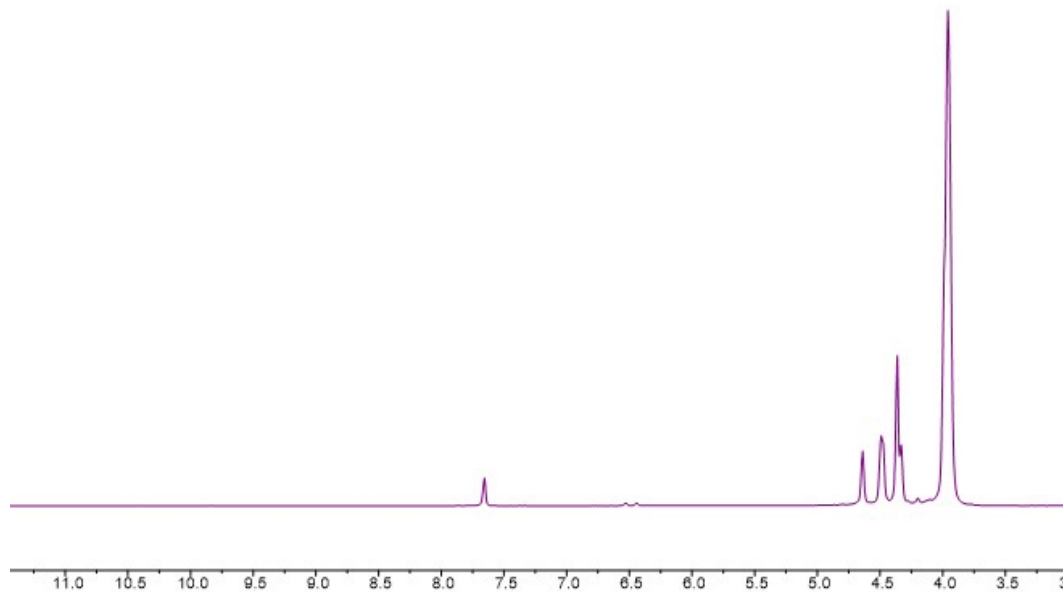

**Figure S12.** Partial views of the  $^1\text{H}$ -NMR spectrum of a solution of compound  $[\text{Fe}(\eta^5\text{-C}_5\text{H}_5)\{[(\eta^5\text{-C}_5\text{H}_4)\text{-S(O)}_2\text{-NH-N=CH-(}\eta^5\text{-C}_5\text{H}_4)]\text{Re(CO)}_3\}]$  (**5a**) in a mixture  $\text{DMSO-d}_6\text{:D}_2\text{O}$  (1:1) at 298 K.

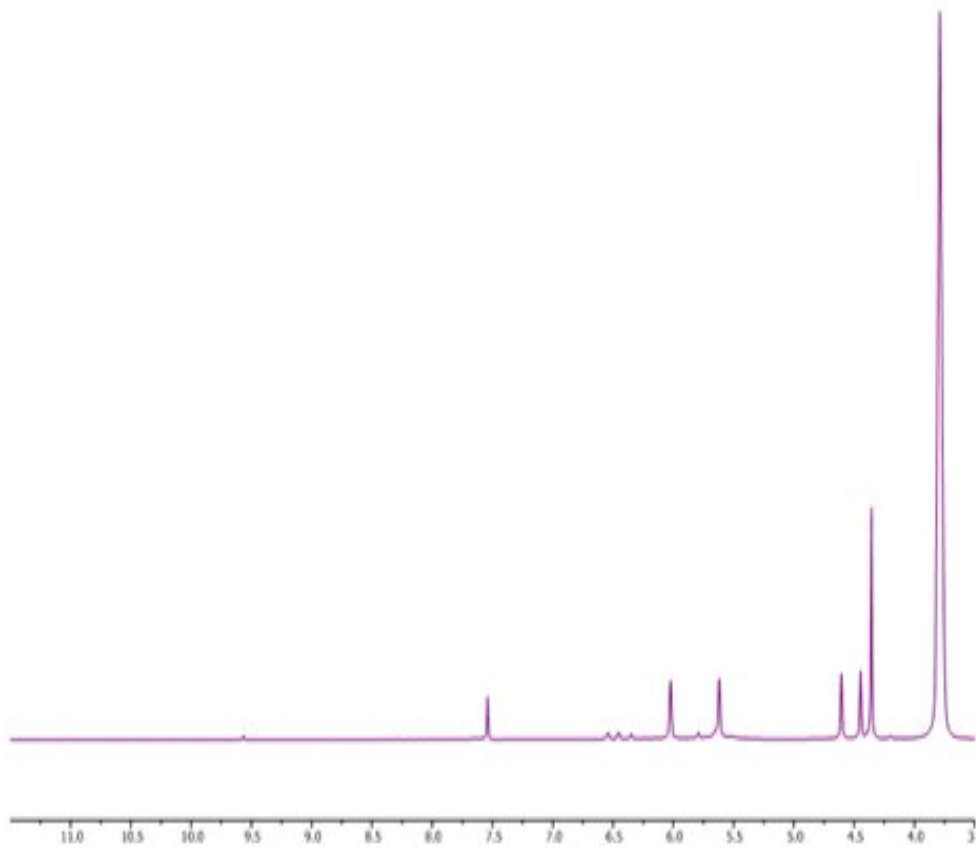

**Figure S13.** Partial views of the  $^1\text{H}$ -NMR spectra of a freshly prepared solution of compound  $[\text{Fe}(\eta^5\text{-C}_5\text{H}_5)\{[(\eta^5\text{-C}_5\text{H}_4)\text{-S}(\text{O})_2\text{-NH-N=CH-(}\eta^5\text{-C}_5\text{H}_4)]\text{Mn}(\text{CO})_3\}]$  (**5b**) in a mixture  $\text{DMSO-d}_6\text{:D}_2\text{O}$  (1:1) and after different periods of storage ( $t$ ) at 298 K.

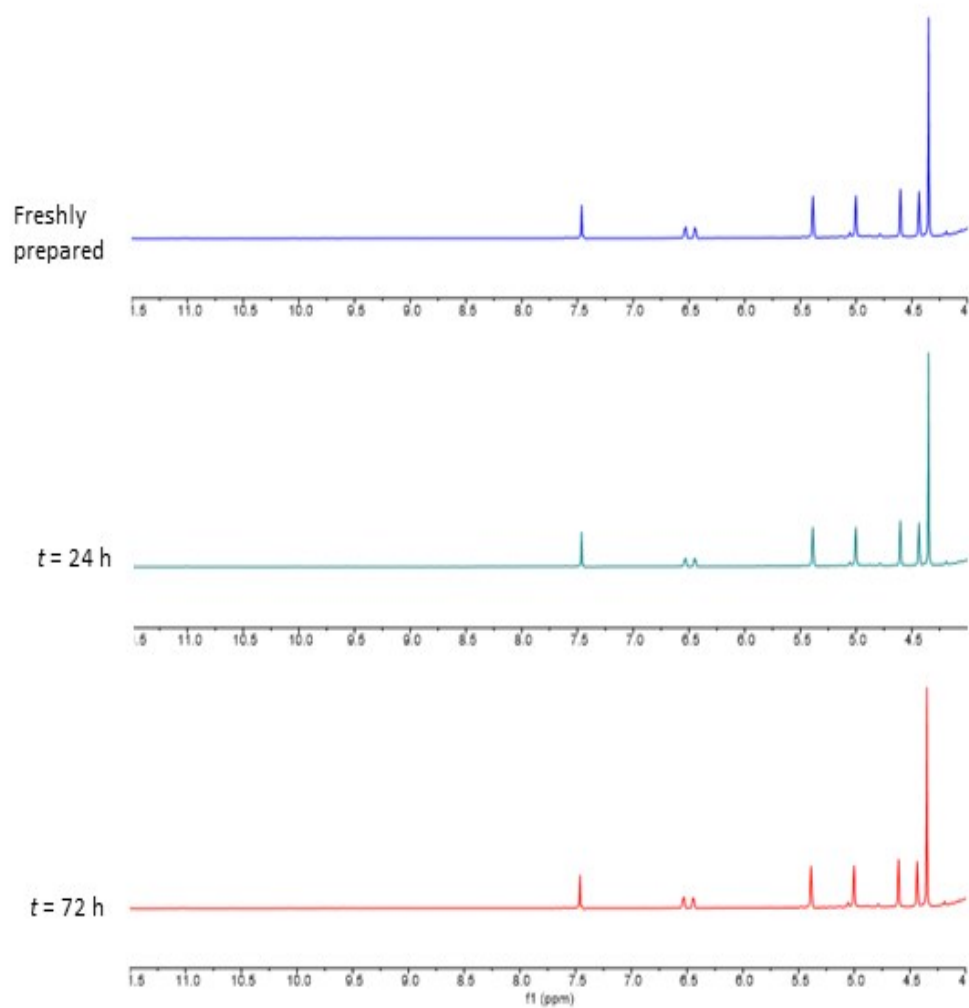



**Figure S14.** The cyclic voltammograms for compound **4**, at a scan rate of 50, 100, 250 mV s<sup>-1</sup>.

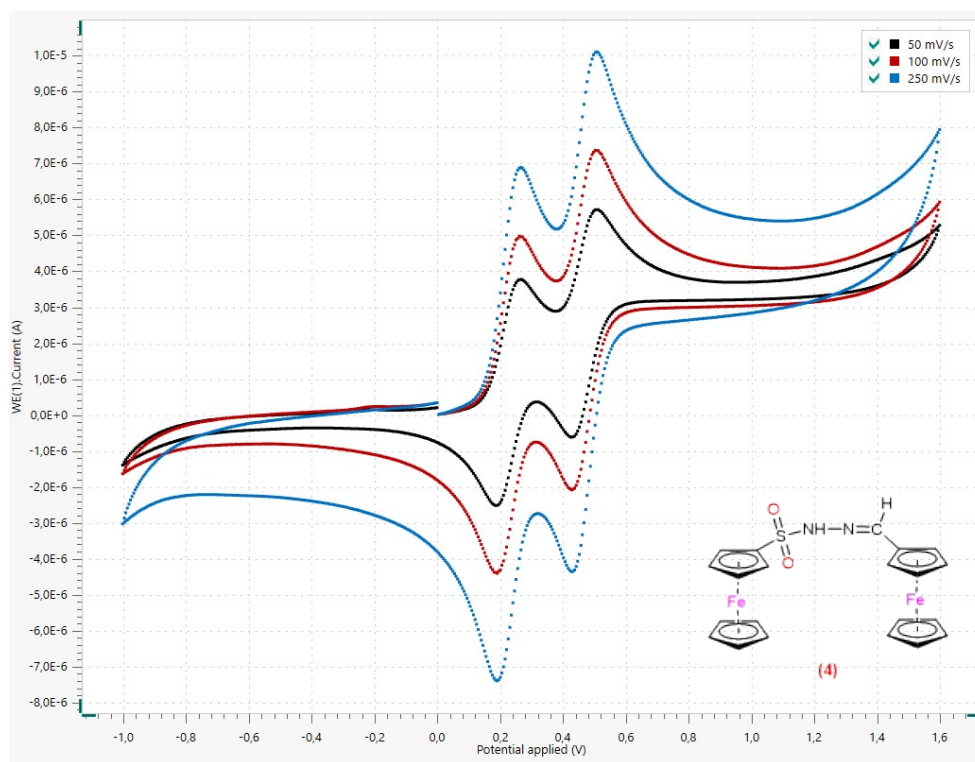

**Figure S15.** The cyclic voltammograms for compound **5a**, at scan rates of 50, 100, 250 mV s<sup>-1</sup>.

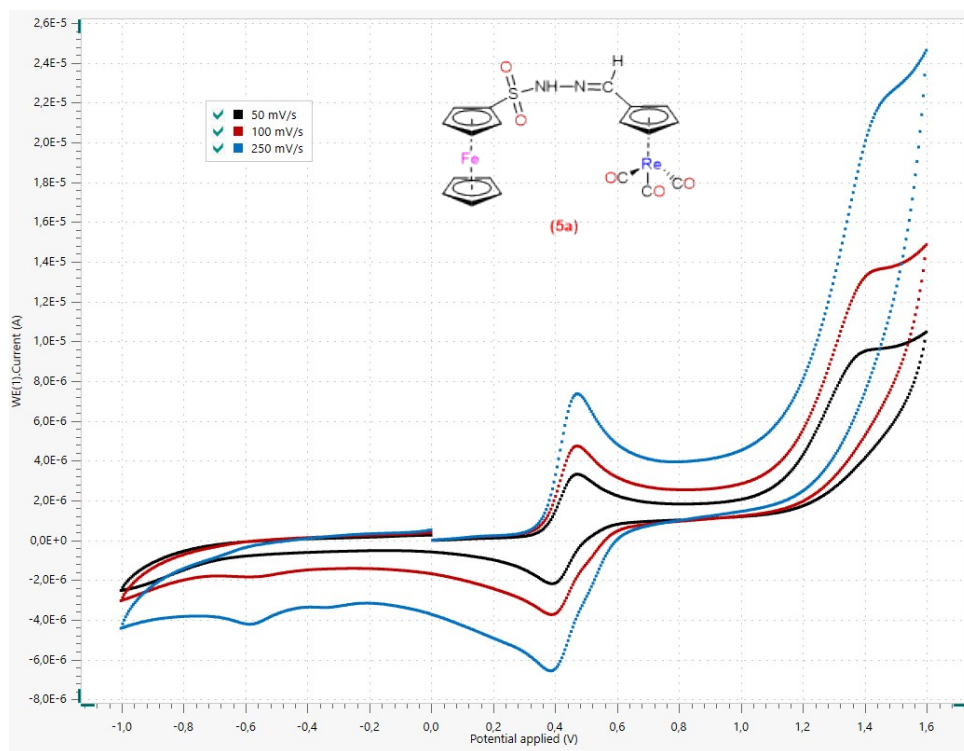

**Figure S16.** The cyclic voltammograms for compound **5b**, at scan rates of 50, 100, 250 mV s<sup>-1</sup>.

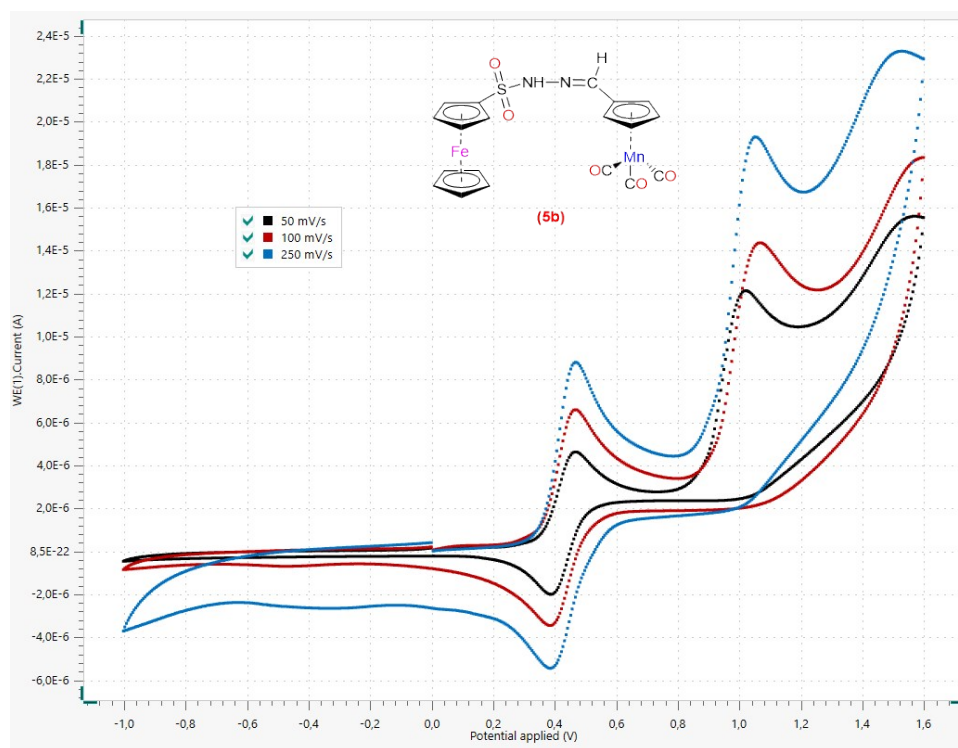

**Figure S17.** BJ Inhibition of cell growth proliferation in the normal and non-tumoral BJ cell line after 72 h of exposure to compounds **2**, **4**, **5a**, **5b** and cisplatin.

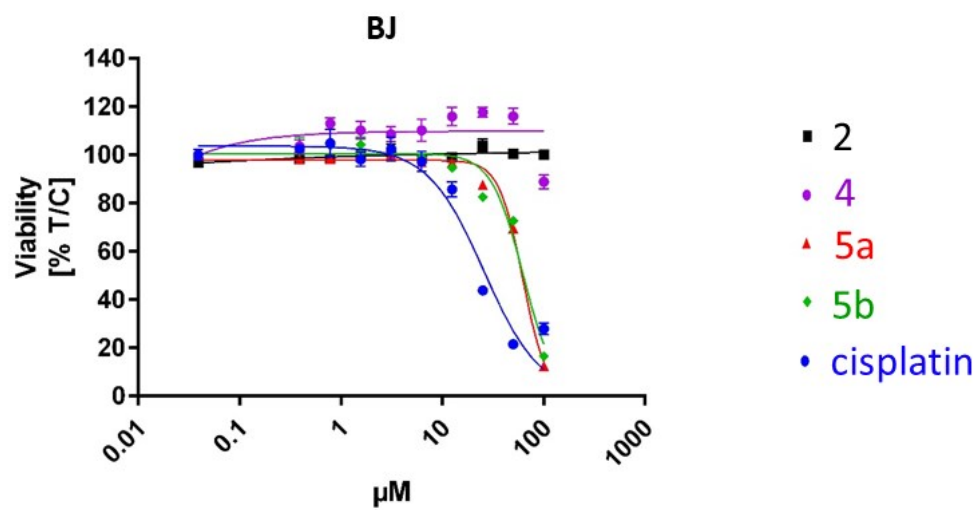

## 2. Supplementary Tables

**Table S1.** Crystal data and details of the refinement of the crystal structures of compounds:  $[\text{Fe}(\eta^5\text{-C}_5\text{H}_5)\{\{\eta^5\text{-C}_5\text{H}_4\}\text{-SO}_2\text{NHN=CMe}_2\}]$  (**3**) and  $[\text{Fe}(\eta^5\text{-C}_5\text{H}_5)\{\{\{\eta^5\text{-C}_5\text{H}_4\}\text{-S(O)}_2\text{-NH-N=CH-}(\eta^5\text{-C}_5\text{H}_4)\}\}\text{M}(\text{CO})_3\}]$  with M = Re (**5a**) or Mn (**5b**).

|                                            | <b>3</b>                                                          | <b>5a</b>                                                           | <b>5b</b>                                                           |
|--------------------------------------------|-------------------------------------------------------------------|---------------------------------------------------------------------|---------------------------------------------------------------------|
| Crystal size (mm × mm × mm)                | 0.18 × 0.15 × 0.12                                                | 0.155 × 0.134 × 0.088                                               | 0.18 × 0.05 × 0.012                                                 |
| Empirical formula                          | C <sub>13</sub> H <sub>16</sub> FeN <sub>2</sub> O <sub>2</sub> S | C <sub>19</sub> H <sub>15</sub> FeN <sub>2</sub> O <sub>5</sub> ReS | C <sub>19</sub> H <sub>15</sub> FeN <sub>2</sub> O <sub>5</sub> MnS |
| Formula weight                             | 320.20                                                            | 625.44                                                              | 494.18                                                              |
| T(K)                                       | 298                                                               | 298                                                                 | 298                                                                 |
| λ(Å)                                       | 0.71073                                                           | 0.71073                                                             | 0.71073                                                             |
| Crystal system                             | Monoclinic                                                        | Monoclinic                                                          | Triclinic                                                           |
| Space group                                | C2/c                                                              | P2 <sub>1</sub> /n                                                  | P-1                                                                 |
| a (Å)                                      | 20.8459(10)                                                       | 12.6127(8)                                                          | 7.1339(3)                                                           |
| b (Å)                                      | 9.8908(5)                                                         | 7.7038(5)                                                           | 15.3593(6)                                                          |
| c (Å)                                      | 13.3379(7)                                                        | 22.0053(15)                                                         | 18.4395(7)                                                          |
| α (deg)                                    | 90                                                                | 90                                                                  | 80.8480(19)                                                         |
| β (deg.)                                   | 95.843(3)                                                         | 99.323(2)                                                           | 84.4154(17)                                                         |
| γ (deg)                                    | 90                                                                | 90                                                                  | 81.2946(17)                                                         |
| V (Å <sup>3</sup> )                        | 2735.8(2)                                                         | 2109.9(2)                                                           | 1996.19(14)                                                         |
| Z                                          | 8                                                                 | 4                                                                   | 4                                                                   |
| D <sub>calc.</sub> (Mg × m <sup>-3</sup> ) | 1.555                                                             | 1.969                                                               | 1.669                                                               |
| μ (mm <sup>-1</sup> )                      | 1.253                                                             | 6.550                                                               | 1.520                                                               |
| F(000)                                     | 1328                                                              | 1200                                                                | 1000                                                                |
| Θ Range for data collec. (deg.)            | from 2.281 to 29.853                                              | from 1.749 to 27.504                                                | from 1.356 to 29.259                                                |
| Index ranges                               | -27 ≤ h ≤ 28<br>-13 ≤ k ≤ 13<br>-18 ≤ l ≤ 18                      | -16 ≤ h ≤ 16<br>-9 ≤ k ≤ 10<br>-28 ≤ l ≤ 27                         | -19 ≤ h ≤ 9<br>-21 ≤ k ≤ 21<br>-25 ≤ l ≤ 25                         |

|                                       |                                                       |                                    |                                    |
|---------------------------------------|-------------------------------------------------------|------------------------------------|------------------------------------|
| N. of collected reflections           | 45313                                                 | 48431                              | 38060                              |
| N. Independent. reflec. [ $R_{int}$ ] | 3863 [0.0252]                                         | 4843 [0.0309]                      | 10926(0.0255)                      |
| Completeness to $\Theta = 25.242$     | 98.75                                                 | 100 %                              | 99.9 %                             |
| Absorption correction                 | ←————— Semiempirical from equivalents<br>—————→       |                                    |                                    |
| Refinement method                     | ←————— Full- matrix least- squares on $F^2$<br>—————→ |                                    |                                    |
| N. of parameters                      | 174                                                   | 266                                | 523                                |
| Goodness of fit on $F^2$              | 1.080                                                 | 1.071                              | 1.027                              |
| Final R indices [ $I > 2\sigma(I)$ ]  | $R_1 = 0.0406$<br>$wR_2 = 0.1059$                     | $R_1 = 0.0250,$<br>$wR_2 = 0.0544$ | $R_1 = 0.0327,$<br>$wR_2 = 0.0832$ |
| Final R indices (all data)            | $R_1 = 0.0486,$<br>$wR_2 = 0.1117$                    | $R_1 = 0.0301,$<br>$wR_2 = 0.0562$ | $R_1 = 0.0426,$<br>$wR_2 = 0.0898$ |

---

**Table S2.** Final atomic coordinates for the optimized geometry of compound  $[\text{Fe}(\eta^5\text{-C}_5\text{H}_5)\{(\eta^5\text{-C}_5\text{H}_4)\text{-S}(\text{O})_2\text{-NH-NH}_2\}]$  (**2**).

| Atom | x         | y         | z         |
|------|-----------|-----------|-----------|
| Fe   | -0.461474 | 0.4704    | 0.797537  |
| H    | 0.522196  | 3.037422  | 0.088060  |
| C    | 0.207536  | 2.082250  | -0.311543 |
| C    | -1.122335 | 1.735429  | -0.701013 |
| H    | 2.099966  | 0.868002  | -0.278181 |
| H    | -1.987302 | 2.383469  | -0.646130 |
| C    | -1.127747 | 0.380885  | -1.137185 |
| H    | -1.978816 | -0.192466 | -1.477778 |
| C    | 0.216708  | -0.108948 | -1.015715 |
| C    | 1.045996  | 0.947577  | -0.505862 |
| H    | -1.572306 | 2.005503  | 2.903990  |
| C    | -1.196412 | 1.023709  | 2.646172  |
| C    | 0.158206  | 0.587512  | 2.759995  |
| H    | -3.020294 | -0.033458 | 1.885878  |
| H    | 0.988812  | 1.182932  | 3.116718  |
| C    | 0.229782  | -0.758164 | 2.292889  |
| H    | 1.124933  | -1.360093 | 2.208789  |
| C    | -1.081865 | -1.155941 | 1.891270  |
| H    | -1.347535 | -2.109599 | 1.454650  |
| C    | -1.961963 | -0.055644 | 2.111748  |
| S    | 0.746996  | -1.752111 | -1.408698 |
| O    | 1.992471  | -1.992576 | -0.675471 |
| O    | -0.414070 | -2.641423 | -1.319125 |
| N    | 1.177611  | -1.747426 | -3.060233 |
| H    | 0.350161  | -1.683117 | -3.649014 |
| N    | 2.194846  | -0.869186 | -3.489248 |
| H    | 2.070258  | 0.069606  | -3.100008 |
| H    | 3.075404  | -1.243146 | -3.144078 |





**Table S3.** Final atomic coordinates for the optimized geometry of compound [Fe( $\eta^5$ -C<sub>5</sub>H<sub>5</sub>){( $\eta^5$ -C<sub>5</sub>H<sub>4</sub>)-S(O)<sub>2</sub>-NH=CMe<sub>2</sub>}] (**3**).

| Atom | x         | y         | z         |
|------|-----------|-----------|-----------|
| Fe   | 1.472446  | -1.086039 | 1.452730  |
| H    | 0.717492  | -3.529735 | 0.214624  |
| C    | 0.824982  | -2.465176 | 0.052510  |
| C    | 2.003326  | -1.804693 | -0.413592 |
| H    | -1.179785 | -1.645280 | 0.662363  |
| H    | 2.941159  | -2.283352 | -0.663967 |
| C    | 1.749596  | -0.405668 | -0.461213 |
| H    | 2.437040  | 0.372631  | -0.761140 |
| C    | 0.399622  | -0.211298 | -0.020235 |
| C    | -0.175098 | -1.484396 | 0.299446  |
| H    | 3.194589  | -2.842318 | 2.857382  |
| C    | 2.628961  | -1.923594 | 2.943944  |
| C    | 1.272209  | -1.810480 | 3.373060  |
| H    | 4.084803  | -0.365302 | 2.253156  |
| H    | 0.626681  | -0.433263 | 3.317870  |
| C    | 0.904543  | -0.433263 | 3.317870  |
| H    | -0.071086 | -0.022167 | 3.541787  |
| C    | 2.034802  | 0.307186  | 2.855093  |
| H    | 2.054302  | 1.371656  | 2.663639  |
| C    | 3.099533  | -0.613560 | 2.626152  |
| S    | -0.397565 | 1.342020  | 0.192094  |
| O    | -1.530637 | 1.151131  | 1.100265  |
| O    | 0.596912  | 2.393330  | 0.440053  |
| N    | -0.922114 | 1.708226  | -1.404187 |
| H    | -0.976926 | 2.727693  | -1.489177 |
| N    | -2.010013 | 0.963980  | -1.824330 |
| C    | -2.722942 | 1.438995  | -2.779753 |
| C    | -2.473244 | 2.776726  | -3.440899 |
| H    | -2.610446 | 3.607815  | -2.733481 |
| H    | -1.447102 | 2.840820  | -3.825323 |
| H    | -3.162115 | 2.941108  | -4.272995 |
| C    | -3.872014 | 0.599439  | -3.266009 |
| H    | -3.923009 | -0.335717 | -2.704343 |
| H    | -3.763141 | 0.370018  | -4.334524 |
| H    | -4.822548 | 1.137337  | -3.150449 |

**Table S4.** Final atomic coordinates for the optimized geometry of compound [Fe( $\eta^5$ -C<sub>5</sub>H<sub>5</sub>)]{[( $\eta^5$ -C<sub>5</sub>H<sub>4</sub>)-S(O)<sub>2</sub>-NH-N=CH-( $\eta^5$ -C<sub>5</sub>H<sub>4</sub>)]Fe( $\eta^5$ -C<sub>5</sub>H<sub>5</sub>)} (**4**).

| Atom | x         | y         | z         |
|------|-----------|-----------|-----------|
| Fe   | 4.132666  | -0.160446 | -1.253812 |
| H    | 2.579396  | 0.849272  | -3.408863 |
| C    | 2.690532  | 0.859473  | -2.332470 |
| C    | 3.487302  | 1.778791  | -1.582783 |
| H    | 1.438994  | -0.888991 | -1.672082 |
| H    | 4.086171  | 2.580635  | -1.994621 |
| C    | 3.393987  | 1.437035  | -0.204384 |
| H    | 3.889787  | 1.918626  | 0.626727  |
| C    | 2.530482  | 0.294083  | -0.113286 |
| C    | 2.092350  | -0.063401 | -1.429925 |
| H    | 4.380372  | -2.277665 | -3.105590 |
| C    | 4.886617  | -1.77368  | -2.292399 |
| C    | 4.764814  | -2.087434 | -0.906522 |
| H    | 6.046952  | -0.167580 | -3.342242 |
| H    | 4.136045  | -2.855164 | -0.475626 |
| C    | 5.56696   | -1.160634 | -0.173120 |
| H    | 5.653999  | -1.115653 | 0.904543  |
| C    | 6.185239  | -0.277323 | -1.107304 |
| H    | 6.838558  | 0.550486  | -0.863692 |
| C    | 5.763252  | -0.653851 | -2.417730 |
| S    | 2.105277  | -0.537512 | 1.383469  |
| O    | 1.825163  | -1.935131 | 1.074371  |
| O    | 3.057621  | -0.131756 | 2.420289  |
| N    | 0.635431  | 0.163840  | 1.914882  |
| H    | 0.806757  | 1.066299  | 2.370426  |
| N    | -0.403472 | 0.095491  | 1.016707  |
| C    | -1.339880 | 0.964499  | 1.134948  |
| H    | -1.292610 | 1.759127  | 1.893305  |
| Fe   | -4.334649 | 0.094939  | 0.764460  |
| H    | -2.299521 | -0.975879 | -0.865525 |
| C    | -2.875176 | -0.082683 | -0.667117 |

|   |           |           |           |
|---|-----------|-----------|-----------|
| C | -2.517579 | 0.934423  | 0.280112  |
| H | -4.643420 | -0.274563 | -2.023775 |
| C | -3.558632 | 1.924559  | 0.262764  |
| H | -3.592584 | 2.815401  | 0.877259  |
| C | -4.532419 | 1.529400  | -0.698415 |
| C | -4.107023 | 0.293519  | -1.274788 |
| H | -3.975390 | 0.385711  | 3.554147  |
| C | -4.534567 | -0.151514 | 2.798933  |
| C | -4.144761 | -1.380706 | 2.184348  |
| H | -6.324220 | 1.157351  | 2.469229  |
| H | -3.232815 | -1.929092 | 2.381901  |
| C | -5.150548 | -1.734670 | 1.236293  |
| H | -5.137980 | -2.605838 | 0.594083  |
| C | -6.157491 | -0.723114 | 1.259381  |
| H | -7.045157 | -0.694329 | 0.640823  |
| C | -5.776494 | 0.256227  | 2.225546  |
| H | -5.442796 | 2.063271  | -0.937553 |

**Table S5.** Final atomic coordinates for the optimized geometry of compound [Fe( $\eta^5$ -C<sub>5</sub>H<sub>5</sub>){[( $\eta^5$ -C<sub>5</sub>H<sub>4</sub>)-S(O)<sub>2</sub>-NH-N=CH-( $\eta^5$ -C<sub>5</sub>H<sub>4</sub>)]Re(CO)<sub>3</sub>}] (**5a**).

| Atom | x         | y         | z         |
|------|-----------|-----------|-----------|
| Re   | 2.083289  | -0.618959 | -3.537940 |
| Fe   | -1.650293 | -0.764982 | 2.821387  |
| S    | -1.224626 | 2.158707  | 1.253237  |
| O    | -0.423734 | -1.110935 | -5.261039 |
| O    | -2.632827 | 2.557318  | 1.317623  |
| C    | 2.896425  | 0.970535  | -1.983952 |
| H    | 2.925710  | 0.765436  | -0.922787 |
| O    | -0.214376 | 2.684264  | 2.164086  |
| C    | 0.524781  | -0.969718 | -4.606216 |
| N    | -0.784593 | 2.640676  | -0.339234 |
| C    | -1.119525 | 0.401697  | 1.265653  |
| N    | 0.393758  | 2.135521  | -0.810965 |
| C    | -2.158641 | -0.500271 | 0.855651  |
| H    | -3.139590 | -0.216699 | 0.500392  |
| O    | 3.670874  | -2.842166 | -4.959000 |
| C    | 3.931830  | 0.719771  | -2.923405 |
| H    | 4.900677  | 0.292892  | -2.702775 |
| C    | 0.015336  | -0.361821 | 1.695321  |
| H    | 0.941393  | 0.049442  | 2.070284  |
| C    | 1.791091  | 1.585106  | -2.667210 |
| C    | 0.553168  | 2.088195  | -2.082431 |
| H    | -0.222881 | 2.429203  | -2.779657 |
| C    | 3.039547  | -2.030562 | -4.420435 |
| O    | 1.131540  | -2.581492 | -1.357086 |
| C    | -2.115982 | -1.947882 | 4.444051  |
| H    | -1.990790 | -3.021905 | 4.491140  |
| C    | -1.138925 | -0.971564 | 4.805935  |
| H    | -0.140965 | -1.176772 | 5.170910  |
| C    | -3.018802 | 0.143279  | 4.057103  |
| H    | -3.685609 | 0.936111  | 3.744756  |

|   |           |           |           |
|---|-----------|-----------|-----------|
| C | 2.161398  | 1.675516  | -4.056432 |
| H | 1.548916  | 2.099026  | -4.842385 |
| C | 3.474621  | 1.157270  | -4.214079 |
| H | 4.035348  | 1.117595  | -5.137814 |
| C | -1.657874 | -1.819657 | 1.038287  |
| H | -2.204137 | -2.733934 | 0.847285  |
| C | -0.328359 | -1.733661 | 1.552534  |
| H | 0.305657  | -2.571754 | 1.808677  |
| C | -1.695965 | 0.319740  | 4.567867  |
| H | -1.189936 | 1.267479  | 4.697772  |
| C | -3.277510 | -1.257820 | 3.982283  |
| H | -4.185628 | -1.718072 | 3.614856  |
| C | 1.474027  | -1.861636 | -2.200148 |
| H | -1.597819 | 2.617483  | -0.962102 |

**Table S6.** Final atomic coordinates for the optimized geometry of compound [Fe( $\eta^5$ -C<sub>5</sub>H<sub>5</sub>){[( $\eta^5$ -C<sub>5</sub>H<sub>4</sub>)-S(O)<sub>2</sub>-NH-N=CH-( $\eta^5$ -C<sub>5</sub>H<sub>4</sub>)]Mn(CO)<sub>3</sub>}] (**5b**).

| Atom | x         | y         | z         |
|------|-----------|-----------|-----------|
| Mn   | 2.325962  | -0.511826 | -3.190907 |
| Fe   | -1.754080 | -0.807672 | 2.685664  |
| S    | -1.266774 | 2.153589  | 1.166558  |
| O    | -0.254496 | -1.500961 | -4.226089 |
| O    | -2.603755 | 2.725119  | 1.334275  |
| C    | 2.935474  | 1.244100  | -2.067163 |
| H    | 3.053715  | 1.275452  | -0.992647 |
| O    | -0.138279 | 2.512190  | 2.016312  |
| C    | 0.767293  | -1.148439 | -3.814035 |
| N    | -0.849582 | 2.625977  | -0.435972 |
| C    | -1.412674 | 0.400100  | 1.107852  |
| N    | 0.325445  | 2.119416  | -0.912133 |
| C    | -2.637739 | -0.321317 | 0.903768  |
| H    | -3.618189 | 0.120046  | 0.792592  |
| O    | 3.955171  | -2.591769 | -4.499931 |
| C    | 3.938563  | 0.928253  | -3.017209 |
| H    | 4.966687  | 0.674381  | -2.797476 |
| C    | -0.335516 | -0.538277 | 1.231953  |
| H    | 0.702381  | -0.290195 | 1.397289  |
| C    | 1.722306  | 1.548530  | -2.760865 |
| C    | 0.462625  | 2.004487  | -2.181803 |
| H    | -0.342892 | 2.267088  | -2.880255 |
| C    | 3.291821  | -1.801562 | -3.977201 |
| O    | 2.154674  | -1.974618 | -0.635146 |
| C    | -2.053300 | -2.042452 | 4.309831  |
| H    | -2.109715 | -3.122717 | 4.273819  |
| C    | -0.866355 | -1.268932 | 4.487084  |
| H    | 0.136257  | -1.661210 | 4.598057  |
| C    | -2.638730 | 0.191288  | 4.248469  |
| H    | -3.210484 | 1.103973  | 4.142121  |

|   |           |           |           |
|---|-----------|-----------|-----------|
| C | 1.997206  | 1.398839  | -4.163087 |
| H | 1.286921  | 1.563582  | -4.963512 |
| C | 3.352892  | 1.025546  | -4.319612 |
| H | 3.858460  | 0.850335  | -5.259963 |
| C | -2.308104 | -1.705866 | 0.905264  |
| H | -3.011777 | -2.521977 | 0.804219  |
| C | -0.899580 | -1.837693 | 1.104863  |
| H | -0.351019 | -2.767467 | 1.174028  |
| C | -1.226360 | 0.110350  | 4.448135  |
| H | -0.547894 | 0.951179  | 4.507252  |
| C | -3.148889 | -1.138576 | 4.166465  |
| H | -4.181561 | -1.413558 | 3.995468  |
| C | 2.201066  | -1.424855 | -1.651996 |
| H | -1.667175 | 2.598116  | -1.054335 |

**Table S7.** Summary of experimental ultraviolet data [position of the bands (wavelengths  $\lambda_i$  (in nm) and logarithms of the molar extinction coefficients, ( $\log \epsilon_i$  , in parenthesis)] and computational studies [Monoelectronic transitions with greater contributions ( $\geq 15\%$ ) to the absorption bands detected in the UV- vis spectra of compounds **2-4**, **5a** and **5b**, calculated position of the bands  $\lambda_i$  (calc) in nm and oscillator strengths ( $f$ )].

| Compound                         | Experimental data                  | Computational studies              |                     |        |       |        |
|----------------------------------|------------------------------------|------------------------------------|---------------------|--------|-------|--------|
|                                  |                                    | Assignment                         | $\lambda_i$ (calc.) | $f$    |       |        |
| <b>2</b>                         | 228 (3.9)                          | HOMO-3 $\rightarrow$ LUMO (34 %)   | 230.5               | 0.0076 |       |        |
|                                  |                                    | HOMO-4 $\rightarrow$ LUMO+1 (27 %) |                     |        |       |        |
|                                  | 262 (3.6)                          | HOMO $\rightarrow$ LUMO+2 (91 %)   | 264.2               | 0.0013 |       |        |
|                                  |                                    | HOMO-1 $\rightarrow$ LUMO+2 (78 %) | 248.6               | 0.0193 |       |        |
| <b>3</b>                         | 228 (4.1)                          | HOMO-3 $\rightarrow$ LUMO (39 %)   | 226.0               | 0.0057 |       |        |
|                                  |                                    | HOMO-2 $\rightarrow$ LUMO+3 (35 %) |                     |        |       |        |
|                                  |                                    | HOMO-3 $\rightarrow$ LUMO (30 %)   |                     |        | 230.1 | 0.0158 |
|                                  | 262 (4.9)                          | HOMO-5 $\rightarrow$ LUMO (29 %)   | 251.5               | 0.0173 |       |        |
|                                  |                                    | HOMO-4 $\rightarrow$ LUMO+1 (24 %) |                     |        |       |        |
|                                  |                                    | HOMO-1 $\rightarrow$ LUMO+3 (54 %) |                     |        |       |        |
|                                  | HOMO-1 $\rightarrow$ LUMO+2 (28 %) | 266.4                              | 0.0110              |        |       |        |
| <b>4</b>                         | 228(4.2)                           | HOMO $\rightarrow$ LUMO+3 (84 %)   | 223.9               | 0.0369 |       |        |
|                                  |                                    | HOMO-4 $\rightarrow$ LUMO+4 (31 %) |                     |        |       |        |
|                                  |                                    | HOMO $\rightarrow$ LUMO+5 (37 %)   |                     |        | 225.8 | 0.0027 |
|                                  |                                    | HOMO-4 $\rightarrow$ LUMO+1 (16 %) |                     |        | 227.7 | 0.0023 |
|                                  |                                    | HOMO-2 $\rightarrow$ LUMO+4 (73 %) |                     |        | 228.5 | 0.0023 |
|                                  | HOMO-10 $\rightarrow$ LUMO (27 %)  | 229.2                              | 0.0411              |        |       |        |
|                                  | 261 <sup>a</sup>                   | HOMO $\rightarrow$ LUMO+2 (90 %)   | 259.2               | 0.0362 |       |        |
| HOMO-4 $\rightarrow$ LUMO (57 %) |                                    | 260.9                              | 0.4555              |        |       |        |
|                                  | HOMO $\rightarrow$ LUMO+1(15 %)    |                                    |                     |        |       |        |



|                        |                      |                         |        |        |
|------------------------|----------------------|-------------------------|--------|--------|
|                        |                      | HOMO-2 → LUMO+5 (79 %)  | 261.1  | 0.0202 |
|                        |                      | HOMO-1 → LUMO+1 (96 %)  | 262.1  | 0.0025 |
|                        |                      | HOMO-2 → LUMO+5 (79 %)  | 262.6  | 0.0085 |
|                        |                      | HOMO → LUMO+1 (76 %)    | 267.5  | 0.1270 |
|                        | 294 (4.0)            | HOMO-3 → LUMO+4 (88 %)  | 295.3  | 0.0426 |
|                        |                      | HOMO → LUMO+4 (54 %)    | 305.2  | 0.0703 |
|                        |                      | HOMO → LUMO (34 %)      |        |        |
| <b>5a</b>              | 228 (4.2)            | HOMO-4 → LUMO+5 (69 %)  | 226.9  | 0.0062 |
|                        |                      | HOMO-1 → LUMO+6 (28 %)  | 229.3  | 0.0020 |
|                        | 244 (4.2)            | HOMO-2 → LUMO+3 (41%)   | 236.0  | 0.0229 |
|                        |                      | HOMO-2 → LUMO+3 (33 %)  | 238.1  | 0.0103 |
|                        |                      | HOMO-8 → LUMO (35 %)    |        |        |
|                        |                      | HOMO-5 → LUMO+2 (58 %)  | 243.2  | 0.0040 |
|                        |                      | HOMO-6 → LUMO (48 %)    | 250.6  | 0.0746 |
|                        |                      | HOMO-7 → LUMO (16 %)    |        |        |
|                        | 286 (4.0)            | HOMO-2 → LUMO+2 (24%)   | 272.7  | 0.0859 |
|                        |                      | HOMO-3 → LUMO (24 %)    |        |        |
|                        |                      | HOMO-5 → LUMO (31 %)    | 276.9  | 0.0625 |
|                        |                      | HOMO-3 → LUMO (27 %)    |        |        |
|                        |                      | HOMO-1 → LUMO+2(70%)    | 282.3  | 0.0125 |
|                        |                      | HOMO → LUMO+2 (22 %)    |        |        |
| HOMO → LUMO+2 (72 %)   |                      | 283.1                   | 0.0171 |        |
| HOMO-1 → LUMO+2 (19 %) |                      |                         |        |        |
|                        | HOMO-2 → LUMO (81 %) | 302.3                   | 0.1838 |        |
| 347(3.2)               | HOMO → LUMO (83 %)   | 340.1                   | 0.0017 |        |
| <b>5b</b>              | 228 (4.3)            | HOMO-4 → LUMO+9 (33 %)  | 228.8  | 0.0091 |
|                        |                      | HOMO-3 → LUMO+2 (24 %)  | 229.2  | 0.0071 |
|                        |                      | HOMO-3 → LUMO+11 (15 %) |        |        |

|  |           |                        |       |        |
|--|-----------|------------------------|-------|--------|
|  |           | HOMO-2 → LUMO+5 (43 %) | 231.2 | 0.0036 |
|  | 260 (4.0) | HOMO-1 → LUMO+3 (49 %) | 257.2 | 0.0031 |
|  |           | HOMO-1 → LUMO+4 (31 %) |       |        |
|  |           | HOMO-5 → LUMO (26 %)   | 261.7 | 0.1019 |
|  |           | HOMO-1 → LUMO+2 (60 %) | 267.8 | 0.0111 |
|  | 327 (2.7) | HOMO-1 → LUMO (79 %)   | 334.4 | 0.0143 |
|  |           | HOMO → LUMO (75 %)     | 337.3 | 0.0009 |
|  | 451 (2.5) | HOMO-3 → LUMO+4 (25 %) | 464.1 | 0.0007 |
|  |           | HOMO → LUMO+5 (22 %)   |       |        |
|  |           | HOMO-3 → LUMO+3 (18 %) |       |        |

<sup>a</sup>As shown in **Figure 8**, the position of this band was not clearly identified.
